# Supplementary material
Source: MDPI journal article supplement (https://www.mdpi.com/2073-4433/13/6/980)
Supplement: s1 [file s1]

# Characteristics of Fine Particulate Matter (PM<sub>2.5</sub>)-Bound n-Alkanes and Polycyclic Aromatic Hydrocarbons (PAHs) in a Hong Kong Suburban Area

Yuan Gao <sup>1,2</sup>, Zhenhao Ling <sup>3,\*</sup>, Zhuozhi Zhang <sup>2</sup> and Shuncheng Lee <sup>2</sup>

<sup>1</sup> Instrumentation and Service Center for Science and Technology, Beijing Normal University, Zhuhai 519087, China; yuan.gao@bnu.edu.cn

<sup>2</sup> Department of Civil and Environmental Engineering, The Hong Kong Polytechnic University, Hong Kong, China; zhuozhi.g.zhang@gmail.com (Z.Z.); shun-cheng.lee@polyu.edu.hk (S.L.)

<sup>3</sup> School of Atmospheric Sciences, Sun Yat-sen University, Key Laboratory of Tropical Atmosphere-Ocean System, Ministry of Education, and Southern Marine Science and Engineering Guangdong Laboratory (Zhuhai), Zhuhai, 519087 China

\* Correspondence: lingzh3@mail.sysu.edu.cn

**Table S1.** Meteorological data during the whole sampling period.

| Scheme 3.                              | Sampling date                                              | Prevail wind <sup>a</sup> | Wind speed (m/s) | Temperature (°C) | Relative humidity (%) | PAH ng/m <sup>3</sup> | n-alkanes ng/m <sup>3</sup> |
|----------------------------------------|------------------------------------------------------------|---------------------------|------------------|------------------|-----------------------|-----------------------|-----------------------------|
| <i>August/September (summer), 2011</i> | August 10 <sup>th</sup> -11 <sup>st</sup> , 2011           | SW                        | 11.40            | 32               | 69                    | 1.33                  | 66.01                       |
|                                        | August 16 <sup>th</sup> -17 <sup>th</sup> , 2011           | SW                        | 10.90            | 32               | 71                    | 1.25                  | 38.58                       |
|                                        | August 22 <sup>nd</sup> -23 <sup>rd</sup> , 2011           | SW                        | 11.20            | 32               | 71                    | 1.39                  | 72.16                       |
|                                        | August 29 <sup>th</sup> – 30 <sup>th</sup> , 2011          | NW                        | 16.20            | 34               | 64                    | 13.93                 | 100.41                      |
|                                        | September 6 <sup>th</sup> -7 <sup>th</sup> , 2011          | SE                        | 12.70            | 32               | 71                    | 2.42                  | 82.59                       |
|                                        | September 8 <sup>th</sup> – 9 <sup>th</sup> , 2011 (blank) | SE                        | 6.38             | 30               | 76                    | n.a.                  | n.a.                        |
| <i>November/December (fall), 2011</i>  | November 3 <sup>rd</sup> – 4 <sup>th</sup> , 2011          | NE                        | 6.04             | 28               | 68                    | 1.99                  | 191.44                      |
|                                        | November 8 <sup>th</sup> – 9 <sup>th</sup> , 2011          | NE                        | 10.63            | 22               | 80                    | 1.62                  | 80.23                       |
|                                        | November 14 <sup>th</sup> – 15 <sup>th</sup> , 2011        | NE                        | 8.85             | 25               | 68                    | 2.18                  | 164.42                      |
|                                        | November 21 <sup>st</sup> – 22 <sup>nd</sup> , 2011        | NE                        | 10.04            | 22               | 60                    | 1.82                  | 82.51                       |
|                                        | November 22 <sup>nd</sup> -23 <sup>rd</sup> , 2011         | N                         | 9.86             | 23               | 65                    | 3.58                  | 92.44                       |
|                                        | November 25 <sup>th</sup> – 26 <sup>th</sup> , 2011        | NE                        | 10.6             | 22               | 60                    | 1.78                  | 90.77                       |
|                                        | December 1 <sup>st</sup> – 2 <sup>nd</sup> , 2011          | N                         | 9.56             | 16               | 57                    | 1.70                  | 66.52                       |

|                                      |                                                              |    |       |    |    |      |        |
|--------------------------------------|--------------------------------------------------------------|----|-------|----|----|------|--------|
| <i>February/March (winter), 2012</i> | December 3 <sup>rd</sup> – 4 <sup>th</sup> , 2011<br>(blank) | N  | 7.74  | 18 | 80 | n.a. | n.a.   |
|                                      | February 2 <sup>nd</sup> – 3 <sup>rd</sup> , 2012            | NE | 8.89  | 16 | 70 | 2.29 | 66.13  |
|                                      | February 9 <sup>th</sup> – 10 <sup>th</sup> , 2012           | E  | 8.92  | 14 | 79 | 3.71 | 109.26 |
|                                      | February 15 <sup>th</sup> – 16 <sup>th</sup> , 2012          | NE | 5.08  | 20 | 85 | 2.05 | 87.24  |
|                                      | February 20 <sup>th</sup> – 21 <sup>st</sup> , 2012          | NE | 10.01 | 18 | 66 | 2.63 | 181.74 |
|                                      | February 27 <sup>th</sup> – 28 <sup>th</sup> , 2012          | NE | 7.97  | 10 | 80 | 2.03 | 128.95 |
|                                      | March 2 <sup>nd</sup> – 3 <sup>rd</sup> , 2012               | NE | 5.16  | 22 | 83 | 4.15 | 85.98  |
|                                      | March 4 <sup>th</sup> – 5 <sup>th</sup> , 2012 (blank)       | NE | 6.36  | 18 | 89 | n.a. | n.a.   |
| <i>May (spring), 2012</i>            | May 2 <sup>nd</sup> – 3 <sup>rd</sup> , 2012                 | SW | 7.83  | 30 | 74 | 1.71 | 156.32 |
|                                      | May 9 <sup>th</sup> – 10 <sup>th</sup> , 2012                | SW | 6.86  | 31 | 69 | 1.63 | 147.55 |
|                                      | May 14 <sup>th</sup> – 15 <sup>th</sup> , 2012               | SE | 3.11  | 30 | 75 | 1.39 | 50.61  |
|                                      | May 21 <sup>st</sup> – 22 <sup>nd</sup> , 2012               | SE | 11.52 | 27 | 67 | 1.68 | 116.16 |
|                                      | May 24 <sup>th</sup> – 25 <sup>th</sup> , 2012               | E  | 8.33  | 28 | 75 | 1.66 | 145.37 |
|                                      | May 30 <sup>th</sup> – 31 <sup>st</sup> , 2012               | E  | 6.08  | 29 | 75 | 1.66 | 70.52  |
|                                      | June 1 <sup>st</sup> – 2 <sup>nd</sup> , 2012 (blank)        | SE | 10.36 | 27 | 82 | n.a. | n.a.   |

<sup>a</sup> refer to prevail wind direction, N-North, NE-Northeast, E-East, SE-Southeast, S-South, SW-Southwest, W-West, NW-Northwest.

**Table S2.** Data of PM<sub>2.5</sub>, potassium, sulfate, chloride, nitrate, sodium, calcium, ammonium, NO<sub>x</sub>, SO<sub>2</sub>, O<sub>3</sub> and CO during the whole sampling period.

| Date                 | PM <sub>2.5</sub> | µg/m <sup>3</sup> |         |               |         |             |         |               | ppb             |                 |                |        |
|----------------------|-------------------|-------------------|---------|---------------|---------|-------------|---------|---------------|-----------------|-----------------|----------------|--------|
|                      |                   | potas-<br>sium    | sulfate | chlo-<br>ride | nitrate | so-<br>dium | calcium | ammo-<br>nium | NO <sub>x</sub> | SO <sub>2</sub> | O <sub>3</sub> | CO     |
| August 10-11, 2011   | 11.48             | 0.05              | 1.52    |               |         |             |         | 0.63          | 23.78           | 1.97            | 12.93          | 407.07 |
| August 16-17, 2011   | 8.47              | 0.04              | 2.25    |               | 0.33    | 0.21        | 0.42    | 0.90          | 24.29           | 2.85            | 12.49          | 324.06 |
| August 22-23, 2011   | 12.44             | 0.12              | 2.66    | 0.05          | 0.34    | 0.29        | 0.44    | 0.88          | 26.05           | 2.62            |                | 304.60 |
| August 29-30, 2011   | 68.66             | 0.67              | 13.04   | 0.19          | 1.71    | 0.51        | 0.46    | 3.38          |                 | 11.69           | 53.21          | 782.53 |
| September 6-7, 2011  | 44.97             |                   |         | 0.14          | 1.12    |             | 0.47    |               |                 | 10.65           | 45.21          | 658.21 |
| November 3-4, 2011   | 32.97             | 0.46              | 6.83    | 0.74          | 1.91    |             | 0.43    | 2.26          | 22.23           | 5.86            | 31.36          | 441.97 |
| November 8-9, 2011   | 16.35             | 0.39              | 2.28    |               |         | 1.02        | 0.14    | 0.39          | 27.66           | 2.21            |                | 696.63 |
| November 14-15, 2011 | 38.81             | 0.50              |         |               |         | 0.28        | 0.15    | 4.50          | 30.85           | 7.07            | 40.10          | 701.72 |
| November 21-22, 2011 | 31.89             | 0.45              | 7.11    | 1.00          | 2.67    | 0.39        | 0.38    | 2.30          | 23.47           | 5.15            | 30.40          | 485.67 |

|                         |       |      |       |      |      |      |      |      |       |      |       |        |
|-------------------------|-------|------|-------|------|------|------|------|------|-------|------|-------|--------|
| November 22-23,<br>2011 | 47.99 | 0.54 | 8.12  |      |      | 0.95 |      | 2.75 | 26.05 | 2.62 |       | 304.60 |
| November 25-26,<br>2011 | 31.65 | 0.46 | 8.31  | 1.42 | 3.15 | 1.02 | 0.27 | 2.25 | 29.95 | 6.42 | 28.23 | 446.85 |
| December 1-2, 2011      | 28.31 | 0.45 | 8.52  | 1.74 | 2.30 | 0.23 | 0.29 |      | 36.36 | 9.82 | 10.96 |        |
| February 2-3, 2012      | 41.55 |      |       |      |      |      |      |      | 29.44 | 4.09 | 22.54 | 594.12 |
| February 9-10, 2012     | 54.03 |      |       |      |      |      |      |      | 34.26 | 5.39 | 16.42 | 430.90 |
| February 15-16,<br>2012 | 38.38 |      |       |      |      |      |      |      | 50.07 | 5.26 | 12.48 | 629.70 |
| February 20-21,<br>2012 | 47.86 | 0.65 | 9.27  | 1.06 | 2.89 | 0.47 | 0.57 | 3.20 | 31.88 | 5.15 | 32.92 | 484.88 |
| February 27-28,<br>2012 | 35.42 | 0.36 | 4.60  | 0.93 | 1.89 | 0.56 | 0.23 | 1.67 | 59.53 | 3.99 | 2.60  | 747.07 |
| March 2-3, 2012         | 64.70 | 0.78 | 14.20 | 0.83 | 3.38 | 1.04 | 0.15 |      | 80.31 | 7.92 | 10.79 | 709.00 |
| May 2-3, 2012           | 29.79 | 0.15 | 3.87  | 0.35 | 0.73 | 0.51 | 0.20 | 1.40 | 9.01  | 3.17 | 19.34 | 149.91 |
| May 9-10, 2012          | 21.56 | 0.10 | 2.07  | 0.31 | 0.52 | 0.38 | 0.23 | 0.85 | 12.20 | 3.80 | 22.22 | 237.37 |
| May 14-15, 2012         | 13.16 | 0.13 | 3.12  | 0.39 | 0.58 | 0.57 | 0.22 | 1.25 | 21.97 | 3.79 | 11.16 | 247.44 |
| May 21-22, 2012         | 25.43 | 0.23 | 4.90  | 0.67 | 1.27 | 0.69 | 0.22 | 1.74 | 10.27 | 4.37 | 54.27 | 369.94 |
| May 24-25, 2012         | 24.71 | 0.23 | 5.70  | 0.63 | 1.50 | 0.79 | 0.42 | 2.28 | 16.86 | 4.72 | 29.30 | 351.44 |
| May 30-31, 2012         | 22.95 | 0.29 | 4.57  | 0.48 | 1.16 | 0.54 | 0.42 | 1.71 | 39.28 | 3.50 | 12.58 | 423.19 |

a)

### Summer and spring seasons

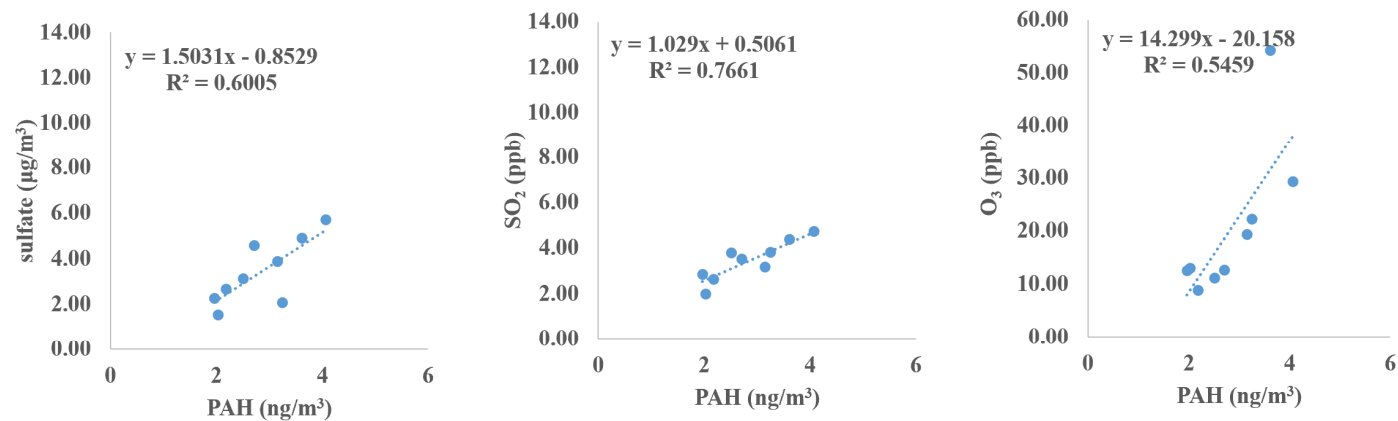

### b) Autumn and winter seasons

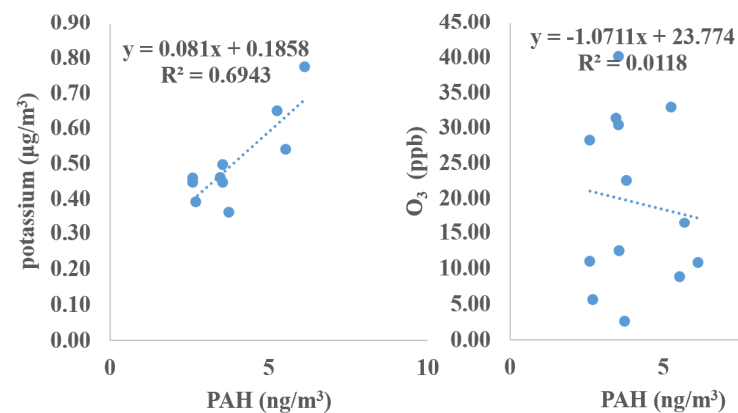

c)

### In whole sampling period

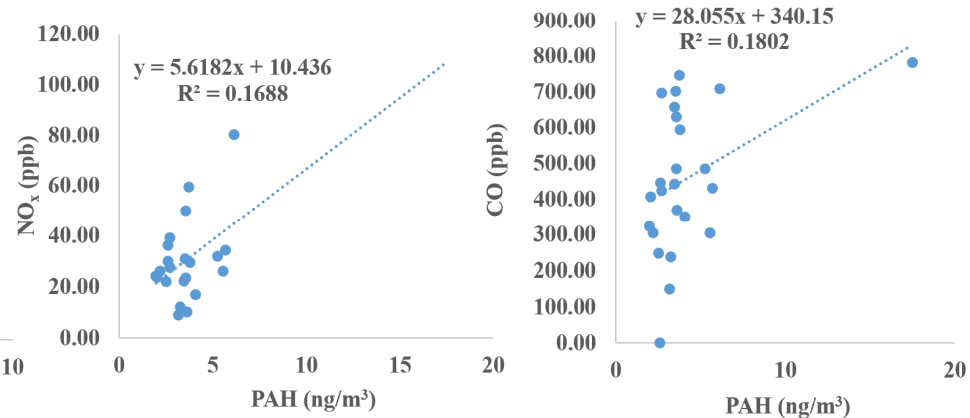

**Figure S1.** correlation plot between a) PAH and sulfate, SO<sub>2</sub> in summer and spring seasons; b) PAH and potassium, O<sub>3</sub> in autumn and winter seasons; c) PAH and NO<sub>x</sub>, CO in whole sampling period.
